# Supplementary material
Source: Elsevier journal article supplement (https://rcastoragev2.blob.core.windows.net/ce28c7bb124c6a149ce4787fed6e2682/mmc1.pdf)
Supplement: mmc1 [file mmc1.pdf]

**Chem Catalysis, Volume 1**

**Supplemental information**

**Combinatorial pathway balancing provides  
biosynthetic access to 2-fluoro-*cis,cis*-muconate  
in engineered *Pseudomonas putida***

**Nicolas T. Wirth and Pablo I. Nikel**

## SUPPLEMENTARY TABLES

Table S1. Genes encoding enzymes involved in processing halogenated benzoates in *P. knackmussii* and their homologs in *P. putida* KT2440 (or in the catabolic pWW0 TOL plasmid of strain mt-2).

Table S2. Specific growth rates of selected strains used in this study.

Table S3. Bacterial strains used in this study.

Table S4. Plasmids used in this study.

Table S5. Performance parameters for selected strains used in this study in the bioconversion of 10 mM 3-FBz.

## SUPPLEMENTARY FIGURES

Figure S1. Physiological response to fluorinated and nonfluorinated ortho-cleavage metabolites.

Figure S2. Quantification of (fluoro)metabolites via HPLC.

Figure S3. Transcriptome analysis of genes within the *ben* and *cat* clusters.

Figure S4. Bioconversion performance of second-generation strains with altered transporter expression.

Table S1. Genes encoding enzymes involved in processing halogenated benzoates in *P. knackmussii* and their homologs in *P. putida* KT2440 (or in the catabolic pWW0 TOL plasmid of strain mt-2).

| <i>P. knackmussii</i><br>gene          | <i>P. putida</i> KT2440 protein with highest<br>homology   % identity | pWW0 protein with highest<br>homology   % identity | Encoded function                                     |
|----------------------------------------|-----------------------------------------------------------------------|----------------------------------------------------|------------------------------------------------------|
| PKB_1739                               | CatA-II (PP_3166)   78.3%<br>CatA (PP_3713)   74.1%                   | none                                               | Catechol 1,2-dioxygenase                             |
| PKB_2098                               | BenR (PP_3159)   72.6%                                                | XylS   58.7%                                       | Transcriptional regulator (XylS homolog)             |
| PKB_2100                               | BenA (PP_3161)   86.7%                                                | XylX   71.7%                                       | Benzoate 1,2-dioxygenase subunit alpha               |
| PKB_2101                               | BenB (PP_3162)   83.9%                                                | XylY   77.2%                                       | Benzoate 1,2-dioxygenase subunit beta                |
| PKB_2102                               | BenC (PP_3163)   84.8%                                                | XylZ   85.2%                                       | Benzoate 1,2-dioxygenase electron transfer component |
| PKB_2103                               | BenD (PP_3164)   79.7%                                                | XylL   77.0%                                       | 1,2-Dihydroxybenzoate dehydrogenase                  |
| PKB_2104                               | CatR (PP_3716)   81.5%                                                | none                                               | HTH-type transcriptional regulator                   |
| PKB_2105                               | CatB (PP_3715)   85%                                                  | none                                               | Muconate cycloisomerase                              |
| PKB_2106                               | CatC (PP_3714)   92.7%                                                | none                                               | Muconolactone $\delta$ -isomerase                    |
| PKB_2107                               | CatA-II (PP_3166)   80.5%<br>CatA (PP_3713)   75.2%                   | none                                               | catechol 1,2-dioxygenase                             |
| PKB_3272                               | YnfL (PP_5071)   32.6%<br>CatR (PP_3716)   33.0%                      | none                                               | LysR family transcriptional regulator                |
| PKB_3273                               | CatA (PP_3713)   31.3%<br>CatA-II (PP_3166)   29.1%                   | none                                               | Catechol 1,2-dioxygenase                             |
| PKB_3274                               | CatB (PP_3715)   42.0%                                                | none                                               | Muconate cycloisomerase                              |
| PKB_3621<br>(identical to<br>PKB_3272) | YnfL (PP_5071)   32.6%<br>CatR (PP_3716)   33.0%                      | none                                               | LysR family transcriptional regulator                |
| PKB_3622<br>(identical to<br>PKB_3273) | CatA (PP_3713)   31.3%<br>CatA-II (PP_3166)   29.1%                   | none                                               | Catechol 1,2-dioxygenase                             |
| PKB_3623<br>(identical to<br>PKB_3274) | CatB (PP_3715)   42.0%                                                | none                                               | Muconate and cycloisomerase                          |

Table rows are shaded to indicate the respective genes' location within separate clusters in the chromosome of *P. knackmussii*. Homology values are based on the amino acid sequences of proteins encoded by the listed genes.

Table S2. Specific growth rates of selected strains used in this study.

| Medium additives                      | Maximum specific growth rate, $\mu_{max}$ (h <sup>-1</sup> ), for strain: |                       |                      |             |
|---------------------------------------|---------------------------------------------------------------------------|-----------------------|----------------------|-------------|
|                                       | <i>P. putida</i><br>KT2440                                                | <i>P. knackmussii</i> | PMP1021/<br>pSEVA228 | PMP1053     |
| 30 mM glucose                         | 1.04 ± 0.09                                                               | 0.40 ± 0.08           | 0.76 ± 0.16          | 0.91 ± 0.12 |
| 30 mM Bz<br>(+ 0.5 mM 3- <i>m</i> Bz) | 0.73 ± 0.14                                                               | no growth             | 0.16 ± 0.09          | 0.39 ± 0.03 |
| 30 mM 2-FBz                           | no growth                                                                 | no growth             | n.d.                 | no growth   |
| 30 mM 3-FBz                           | no growth                                                                 | no growth             | n.d.                 | no growth   |
| 30 mM 4-FBz                           | no growth                                                                 | no growth             | n.d.                 | no growth   |
| 30 mM glucose, 1 mM catechol          | 0.83 ± 0.17                                                               | 0.36 ± 0.06           | 0.83 ± 0.13          | n.d.        |
| 30 mM glucose, 2 mM catechol          | 0.78 ± 0.14                                                               | 0.32 ± 0.01           | 0.89 ± 0.11          | n.d.        |
| 30 mM glucose, 1 mM 3-FC              | 0.63 ± 0.10                                                               | 0.22 ± 0.05           | 0.49 ± 0.03          | n.d.        |
| 30 mM glucose, 2 mM 3-FC              | 0.37 ± 0.01                                                               | 0.12 ± 0.02           | 0.22 ± 0.02          | no growth   |
| 30 mM glucose, 5 mM 3-FC              | no growth                                                                 | no growth             | no growth            | no growth   |
| 30 mM glucose, 1 mM 4-FC              | 0.60 ± 0.11                                                               | 0.24 ± 0.03           | 0.63 ± 0.19          | n.d.        |
| 30 mM glucose, 2 mM 4-FC              | 0.76 ± 0.08                                                               | 0.30 ± 0.01           | 0.50 ± 0.05          | 0.76 ± 0.13 |
| 30 mM glucose, 5 mM 4-FC              | no growth                                                                 | no growth             | no growth            | no growth   |
| 30 mM glucose, 10 mM 2-FBz            | 0.65 ± 0.13                                                               | 0.26 ± 0.02           | n.d.                 | n.d.        |
| 30 mM glucose, 15 mM 2-FBz            | 0.61 ± 0.12                                                               | 0.22 ± 0.03           | n.d.                 | n.d.        |
| 30 mM glucose, 20 mM 2-FBz            | 0.56 ± 0.14                                                               | no growth             | n.d.                 | n.d.        |
| 30 mM glucose, 5 mM 3-FBz             | 0.39 ± 0.19                                                               | 0.05 ± 0.01           | 0.39 ± 0.06          | n.d.        |
| 30 mM glucose, 10 mM 3-FBz            | 0.14 ± 0.08                                                               | no growth             | 0.38 ± 0.04          | 0.45 ± 0.02 |
| 30 mM glucose, 15 mM 3-FBz            | no growth                                                                 | no growth             | 0.36 ± 0.07          | 0.45 ± 0.03 |
| 30 mM glucose, 20 mM 3-FBz            | no growth                                                                 | no growth             | 0.35 ± 0.08          | 0.46 ± 0.02 |
| 30 mM glucose, 30 mM 3-FBz            | no growth                                                                 | no growth             | n.d.                 | 0.24 ± 0.04 |
| 30 mM glucose, 40 mM 3-FBz            | no growth                                                                 | no growth             | n.d.                 | 0.23 ± 0.05 |
| 30 mM glucose, 50 mM 3-FBz            | no growth                                                                 | no growth             | n.d.                 | 0.20 ± 0.04 |
| 30 mM glucose, 10 mM 2-FMA            | 0.98 ± 0.16                                                               | n.d.                  | n.d.                 | 0.98 ± 0.15 |
| 30 mM glucose, 15 mM 2-FMA            | 0.66 ± 0.04                                                               | n.d.                  | n.d.                 | 0.56 ± 0.05 |
| 30 mM glucose, 20 mM 2-FMA            | no growth                                                                 | n.d.                  | n.d.                 | no growth   |

The experiments were performed in 96-well microtiter plates with each well containing 200  $\mu$ L of DBM medium buffered with 5 g L<sup>-1</sup> MOPS and varying concentrations of carbon sources and (fluoro)metabolites involved in the bioconversion process. Maximum specific growth rates were determined by Gaussian process regression. Each experiment was performed in three biological replicates. Growth rates are given as average values  $\pm$  standard deviation. *n.d.*, not determined.

Table S3. Bacterial strains used in this study.

| Strain                     | Genotype / Relevant characteristics                                                                                                                                                                                                                                                                                                                                                                                                | Reference or source             |
|----------------------------|------------------------------------------------------------------------------------------------------------------------------------------------------------------------------------------------------------------------------------------------------------------------------------------------------------------------------------------------------------------------------------------------------------------------------------|---------------------------------|
| <i>Escherichia coli</i>    |                                                                                                                                                                                                                                                                                                                                                                                                                                    |                                 |
| DH5 $\alpha$ $\lambda$ pir | Cloning host; F <sup>-</sup> $\lambda$ - <i>endA1 glnX44(AS) thiE1 recA1 relA1 spoT1 gyrA96(Nal<sup>R</sup>) rfbC1 deoR nupG <math>\Phi</math>80(lacZ<math>\Delta</math>M15) <math>\Delta</math>(argF-lac)U169 <i>hsdR17</i>(r<sub>K</sub>-m<sub>K</sub><sup>+</sup>), <math>\lambda</math> pir lysogen. NCBI Taxonomy ID: 668369</i>                                                                                              | Platt et al. <sup>1</sup>       |
| <i>Pseudomonas</i>         |                                                                                                                                                                                                                                                                                                                                                                                                                                    |                                 |
| <i>P. putida</i> KT2440    | Wild-type strain, derived from <i>P. putida</i> mt-2, <sup>2</sup> cured of the TOL plasmid pWW0. NCBI Taxonomy ID: 160488                                                                                                                                                                                                                                                                                                         | Bagdasarian et al. <sup>3</sup> |
| <i>P. knackmussii</i>      | Wild-type strain, haloaromatic degrader. NCBI Taxonomy ID: 65741                                                                                                                                                                                                                                                                                                                                                                   | Stolz et al. <sup>4</sup>       |
| PMP1000                    | <i>P<sub>lac</sub></i> → <i>benABC</i><br><i>P. putida</i> KT2440 with the chromosomal <i>benABC</i> cluster under control of the constitutive <i>P<sub>lac</sub></i> promoter. <sup>65</sup> The native, validated 5'-UTR of <i>benA</i> was kept unchanged, <sup>66</sup> providing a predicted translation rate of 220.                                                                                                         | This study                      |
| PMP0100                    | <i>P<sub>lac</sub></i> → <i>benD</i><br><i>P. putida</i> KT2440 with <i>benD</i> under control of the constitutive <i>P<sub>lac</sub></i> promoter. The native 28 bp upstream of <i>benD</i> were kept unchanged, providing a translation initiation sequence with a predicted translation rate of 818.                                                                                                                            | This study                      |
| PMP0010                    | <i>P<sub>EM7</sub></i> → <i>catA</i><br><i>P. putida</i> KT2440 with the constitutive <i>P<sub>EM7</sub></i> promoter chromosomally inserted upstream of <i>catA</i> . The native 29 bp upstream of <i>catA</i> were kept unchanged, providing a translation initiation sequence with a predicted translation rate of 3,211.                                                                                                       | This study                      |
| PMP0000a                   | $\Delta$ <i>catBC</i><br><i>P. putida</i> KT2440 with both <i>catB</i> and <i>catC</i> deleted.                                                                                                                                                                                                                                                                                                                                    | This study                      |
| PMP0000b                   | $\Delta$ <i>catBC::catA</i><br><i>P. putida</i> KT2440 with the genes <i>catB</i> and <i>catC</i> replaced with an additional copy of <i>catA</i> . The predicted translation rate of <i>catA</i> with the <i>catB</i> 5'-UTR is 1,934.                                                                                                                                                                                            | This study                      |
| PMP0000c                   | $\Delta$ <i>catBC::catA-II</i><br><i>P. putida</i> KT2440 with <i>catB</i> and <i>catC</i> replaced with an additional copy of <i>catA-II</i> . The predicted translation rate of <i>catA-II</i> with the <i>catB</i> 5'-UTR is 503.                                                                                                                                                                                               | This study                      |
| PMP1000a                   | <i>P<sub>lac</sub></i> → <i>benABC</i> $\Delta$ <i>catBC</i>                                                                                                                                                                                                                                                                                                                                                                       | This study                      |
| PMP0100a                   | <i>P<sub>lac</sub></i> → <i>benD</i> $\Delta$ <i>catBC</i>                                                                                                                                                                                                                                                                                                                                                                         | This study                      |
| PMP0100b                   | <i>P<sub>lac</sub></i> → <i>benD</i> $\Delta$ <i>catBC::catA</i>                                                                                                                                                                                                                                                                                                                                                                   | This study                      |
| PMP0100c                   | <i>P<sub>lac</sub></i> → <i>benD</i> $\Delta$ <i>catBC::catA-II</i>                                                                                                                                                                                                                                                                                                                                                                | This study                      |
| PMP0020                    | <i>Pm(BCD10)</i> → <i>catA</i><br><i>P. putida</i> KT2440 with <i>catA</i> under control of the inducible <i>Pm</i> promoter and the translational coupling sequence <i>BCD10</i> <sup>57</sup> with predicted translation strengths of 28,177 (SD1) and 331 (SD2).                                                                                                                                                                | This study                      |
| PMP0001                    | <i>Pm(BCD10)</i> → <i>catA-II</i><br><i>P. putida</i> KT2440 with <i>catA</i> under control of the inducible <i>Pm</i> promoter and the translational coupling sequence <i>BCD10</i> with predicted translation strengths of 28,177 (SD1) and 134 (SD2).                                                                                                                                                                           | This study                      |
| PMP0021                    | <i>Pm(BCD10)</i> → <i>catA</i> <i>Pm(BCD10)</i> → <i>catA-II</i>                                                                                                                                                                                                                                                                                                                                                                   | This study                      |
| PMP1021                    | <i>P<sub>lac</sub></i> → <i>benABC</i> <i>Pm(BCD10)</i> → <i>catA</i> <i>Pm(BCD10)</i> → <i>catA-II</i>                                                                                                                                                                                                                                                                                                                            | This study                      |
| PMP1041                    | <i>P<sub>lac</sub></i> → <i>benABC</i> <i>xylS/Pm<sub>(ML1-17)</sub>(BCD10)</i> → <i>catA</i> <i>Pm(BCD10)</i> → <i>catA-II</i><br>Strain PMP1011 with <i>xylS</i> and its native regulatory sequences chromosomally integrated upstream of and encoded on the opposite DNA strand as <i>catA</i> , which is controlled by the inducible <i>Pm</i> promoter variant ML1-17. <sup>13</sup>                                          | This study                      |
| PMP1021e                   | <i>P<sub>lac</sub></i> → <i>benABC</i> <i>Pm(BCD10)</i> → <i>catA</i> <i>Pm(BCD10)</i> → <i>catA-II</i><br><i>Pm<sub>(ML1-17)</sub>(BCD10)</i> → <i>nicP-I</i><br>Strain PMP1022 with <i>nicP-I</i> ( <i>benF</i> , a porin-like protein) under control of the inducible <i>Pm</i> promoter variant ML1-17 and the translational coupling sequence <i>BCD10</i> with predicted translation strengths of 31,045 (SD1) and 72 (SD2). | This study                      |
| PMP1021f                   | <i>P<sub>lac</sub></i> → <i>benABC</i> <i>Pm(BCD10)</i> → <i>catA</i><br><i>Pm(BCD10)</i> → <i>catA-II</i><br><i>Pm<sub>(ML1-17)</sub></i> → <i>benE-II</i><br>Strain PMP1022 with <i>benE-II</i> (benzoate transporter) under control of the inducible <i>Pm</i> promoter variant ML1-17 and the translational coupling sequence <i>BCD10</i> with predicted translation strengths of 31,045 (SD1) and 1,594 (SD2).               | This study                      |
| PMP1021g                   | <i>P<sub>lac</sub></i> → <i>benABC</i> <i>Pm(BCD10)</i> → <i>catA</i> <i>Pm(BCD10)</i> → <i>catA-II</i><br><i>Pm<sub>(ML1-17)</sub></i> → <i>benK</i><br>Strain PMP1022 with <i>benK</i> (benzoate transporter) under control of the inducible <i>Pm</i> promoter variant ML1-17 and the translational coupling sequence <i>BCD10</i> with predicted translation strengths of 31,045 (SD1) and 541 (SD2).                          | This study                      |
| PMP1030                    | <i>P<sub>lac</sub></i> → <i>benABC</i> <i>Pm(BCD2)</i> → <i>catA</i><br>Chromosomal <i>benABC</i> gene cluster placed under the control of the constitutive <i>P<sub>lac</sub></i> promoter. Chromosomal <i>catA</i> under control of the inducible <i>Pm</i> promoter and the translational coupling sequence <i>BCD2</i> <sup>12</sup> with predicted translation strengths of 28,177 (SD1) and 18,908 (SD2).                    | This study                      |
| PMP1002                    | <i>P<sub>lac</sub></i> → <i>benABC</i> <i>Pm(BCD2)</i> → <i>catA-II</i><br>Chromosomal <i>benABC</i> gene cluster under control of the constitutive <i>P<sub>lac</sub></i> promoter. Chromosomal <i>catA-II</i> under control of the inducible <i>Pm</i> promoter and the translational coupling sequence <i>BCD2</i> with predicted translation strengths of 28,177 (SD1) and 7,687 (SD2).                                        | This study                      |
| PMP1023                    | <i>P<sub>lac</sub></i> → <i>benABC</i> <i>Pm(BCD10)</i> → <i>catA</i> <i>P<sub>146</sub>(BCD10)</i> → <i>catA-II</i>                                                                                                                                                                                                                                                                                                               | This study                      |

|          |                                                                                                                                                                                                                                                                                                                                                                                                 |            |
|----------|-------------------------------------------------------------------------------------------------------------------------------------------------------------------------------------------------------------------------------------------------------------------------------------------------------------------------------------------------------------------------------------------------|------------|
|          | Chromosomal <i>catA-II</i> under the transcriptional control of the constitutive promoter $P_{14b}$ . <sup>14</sup>                                                                                                                                                                                                                                                                             |            |
| PMP1053  | $P_{18c} \rightarrow benABC P_{14b}(BCD10) \rightarrow catA P_{14b}(BCD10) \rightarrow catA-II$<br>Chromosomal <i>catA</i> and <i>catA-II</i> under the transcriptional control of the constitutive promoter $P_{14b}$ .                                                                                                                                                                        | This study |
| PMP1053d | $P_{18c} \rightarrow benABC P_{14b}(BCD10) \rightarrow catA P_{14b}(BCD10) \rightarrow catA-II \Delta crc$                                                                                                                                                                                                                                                                                      | This study |
| PMP2053  | $P_{18c}(BCD10) \rightarrow benABC P_{14b}(BCD10) \rightarrow catA P_{14b}(BCD10) \rightarrow catA-II$                                                                                                                                                                                                                                                                                          | This study |
| PMP1024  | $P_{18c} \rightarrow benABC Pm(BCD10) \rightarrow catA P_{14g} \rightarrow xylS/Pm(BCD10) \rightarrow catA-II$<br>Chromosomal <i>catA-II</i> under the transcriptional control of a <i>XylS/Pm</i> element, with <i>xylS</i> chromosomally integrated upstream of <i>catA-II</i> under control of $P_{14g}$ and a synthetic translation initiation sequence with a translation rate of 719,862. | This study |

A graphical representation of the strain nomenclature is provided in [Figure 3A](#). Translation initiation rates were determined by using the online *RBS Calculator* 2.1.

Table S4. Plasmids used in this study.

| Plasmid                                                                                       | Relevant characteristics <sup>a</sup>                                                                                                                                                                                                                                                       | Reference or source                                                      |
|-----------------------------------------------------------------------------------------------|---------------------------------------------------------------------------------------------------------------------------------------------------------------------------------------------------------------------------------------------------------------------------------------------|--------------------------------------------------------------------------|
| pGNW2                                                                                         | Suicide vector used for genetic manipulations in Gram-negative bacteria; <i>oriT</i> , <i>traJ</i> , <i>lacZa</i> , <i>ori</i> (R6K), <i>P</i> <sub>14g</sub> ( <i>BCD2</i> )→ <i>msfGFP</i> ; Km <sup>R</sup>                                                                              | Wirth et al. <sup>5</sup>                                                |
| pSNW2                                                                                         | Derivative of vector pGNW2 with the translation initiation sequence of <i>msfGFP</i> replaced by the very strong translational coupling sequence <i>BCD2</i>                                                                                                                                | Volke et al. <sup>6</sup>                                                |
| pSEVA628S                                                                                     | Helper plasmid; <i>oriV</i> (RK2), <i>xylS</i> , <i>Pm</i> → <i>I-SceI</i> ; Gm <sup>R</sup>                                                                                                                                                                                                | Silva-Rocha et al. <sup>7</sup>                                          |
| pSEVA627M                                                                                     | <i>oriV</i> (RK2), <i>msfGFP</i> , <i>oriT</i> , Gm <sup>R</sup>                                                                                                                                                                                                                            | Silva-Rocha et al. <sup>7</sup>                                          |
| pSEVA228                                                                                      | Plasmid used to supply XylS for chromosomal <i>Pm</i> promoters; <i>oriV</i> (RK2), <i>xylS</i> , <i>Pm</i> , Km <sup>R</sup>                                                                                                                                                               | Martínez-García et al. <sup>8</sup>                                      |
| pSEVA228.2                                                                                    | Plasmid used to supply XylS <sup>Thr45</sup> (XylS.2) for chromosomal <i>Pm</i> promoters; <i>oriV</i> (RK2), <i>xylS.2</i> , <i>Pm</i> , Km <sup>R</sup>                                                                                                                                   | Ramos et al. <sup>9</sup>                                                |
| pQURE6-H                                                                                      | Conditionally-replicating vector; derivative of vector pJBSD1 carrying <i>XylS/Pm</i> → <i>I-SceI</i> and <i>P</i> <sub>14g</sub> ( <i>BCD2</i> )→ <i>mRFP</i> ; Gm <sup>R</sup>                                                                                                            | Volke et al. <sup>10</sup>                                               |
| pGNW2- <i>P</i> <sub>tac</sub> → <i>benABC</i>                                                | Derivative of pGNW2 carrying homology arms (HAs) to replace the native <i>P</i> <sub>ben</sub> promoter upstream of <i>benA</i> with the <i>P</i> <sub>tac</sub> promoter sequence in <i>P. putida</i> KT2440                                                                               | This study<br><i>P</i> <sub>tac</sub> : de Boer et al. <sup>11</sup>     |
| pGNW2- <i>P</i> <sub>tac</sub> → <i>benD</i>                                                  | Derivative of pGNW2 carrying HAs to insert the <i>P</i> <sub>tac</sub> promoter sequence upstream of <i>benD</i> in <i>P. putida</i> KT2440                                                                                                                                                 | This study                                                               |
| pGNW2- <i>P</i> <sub>EM7</sub> → <i>catA</i>                                                  | Derivative of pGNW2 carrying HAs to insert the <i>P</i> <sub>EM7</sub> promoter sequence upstream of <i>catA</i> in <i>P. putida</i> KT2440                                                                                                                                                 | This study                                                               |
| pGNW2- <i>Pm</i> ( <i>BCD10</i> )→ <i>catA</i>                                                | Derivative of pGNW2 carrying HAs to insert the <i>Pm</i> promoter and the translational coupling sequence <i>BCD10</i> upstream of <i>catA</i> in <i>P. putida</i> KT2440                                                                                                                   | This study<br><i>BCD10</i> : Mutalik et al. <sup>12</sup>                |
| pGNW2- <i>Pm</i> ( <i>BCD2</i> )→ <i>catA</i>                                                 | Derivative of pGNW2 carrying HAs to insert the <i>Pm</i> promoter and the translational coupling sequence <i>BCD2</i> upstream of <i>catA</i> in <i>P. putida</i> KT2440                                                                                                                    | This study<br><i>BCD2</i> : Mutalik et al. <sup>12</sup>                 |
| pGNW2- <i>xylS/Pm</i> <sub>(ML1-17)</sub> ( <i>BCD10</i> )→ <i>catA</i>                       | Derivative of pGNW2 carrying HAs to insert the <i>xylS</i> gene with its native regulatory sequences, the <i>Pm</i> promoter variant <i>ML1-17</i> , and the translational coupling sequence <i>BCD10</i> upstream of <i>catA</i> in <i>P. putida</i> KT2440                                | This study<br><i>Pm</i> <sub>(ML1-17)</sub> : Bakke et al. <sup>13</sup> |
| pGNW2- <i>P</i> <sub>14g</sub> ( <i>BCD10</i> )→ <i>xylS/Pm</i> ( <i>BCD10</i> )→ <i>catA</i> | Derivative of pGNW2 carrying HAs to insert the <i>xylS</i> gene under the control of <i>P</i> <sub>14g</sub> and <i>BCD10</i> , the <i>Pm</i> promoter, and the translational coupling sequence <i>BCD10</i> upstream of <i>catA</i> in <i>P. putida</i> KT2440                             | This study                                                               |
| pGNW2- <i>Pm</i> ( <i>BCD10</i> )→ <i>catA-II</i>                                             | Derivative of pGNW2 carrying HAs to insert the <i>Pm</i> promoter and the translational coupling sequence <i>BCD10</i> upstream of <i>catA-II</i> in <i>P. putida</i> KT2440                                                                                                                | This study                                                               |
| pGNW2- <i>Pm</i> ( <i>BCD2</i> )→ <i>catA-II</i>                                              | Derivative of pGNW2 carrying HAs to insert the <i>Pm</i> promoter and the translational coupling sequence <i>BCD2</i> upstream of <i>catA-II</i> in <i>P. putida</i> KT2440                                                                                                                 | This study                                                               |
| pSNW2- <i>Pm</i> ( <i>BCD10</i> )→ <i>nicP-I</i>                                              | Derivative of pGNW2 carrying HAs to insert the <i>Pm</i> promoter and the translational coupling sequence <i>BCD10</i> upstream of <i>nicP-I</i> in <i>P. putida</i> KT2440                                                                                                                 | This study                                                               |
| pSNW2- <i>Pm</i> ( <i>BCD10</i> )→ <i>benE-II</i>                                             | Derivative of pGNW2 carrying HAs to insert the <i>Pm</i> promoter and the translational coupling sequence <i>BCD10</i> upstream of <i>benE-II</i> in <i>P. putida</i> KT2440                                                                                                                | This study                                                               |
| pSNW2- <i>Pm</i> ( <i>BCD10</i> )→ <i>benK</i>                                                | Derivative of pGNW2 carrying HAs to insert the <i>Pm</i> promoter and the translational coupling sequence <i>BCD10</i> upstream of <i>benK</i> in <i>P. putida</i> KT2440                                                                                                                   | This study                                                               |
| pGNW2-Δ <i>crc</i>                                                                            | Derivative of pGNW2 carrying HAs to delete <i>crc</i> in <i>P. putida</i> KT2440                                                                                                                                                                                                            | This study                                                               |
| pGNW-Δ <i>catBC</i>                                                                           | Derivative of pGNW2 carrying HAs to delete <i>catBC</i> in <i>P. putida</i> KT2440                                                                                                                                                                                                          | This study                                                               |
| pGNW-Δ <i>catBC</i> :: <i>catA</i>                                                            | Derivative of pGNW2 carrying HAs to delete <i>catBC</i> in <i>P. putida</i> KT2440 replace it with an additional copy of <i>catA</i>                                                                                                                                                        | This study                                                               |
| pGNW-Δ <i>catBC</i> :: <i>catA-II</i>                                                         | Derivative of pGNW2 carrying HAs to delete <i>catBC</i> in <i>P. putida</i> KT2440 replace it with an additional copy of <i>catA-II</i>                                                                                                                                                     | This study                                                               |
| pGNW2- <i>P</i> <sub>tac</sub> ( <i>BCD10</i> )→ <i>benABC</i>                                | Derivative of pGNW2 carrying homology arms (HAs) to replace the native <i>P</i> <sub>ben</sub> promoter upstream of <i>benA</i> with the <i>P</i> <sub>tac</sub> promoter sequence, and the native 5'-UTR with the translational coupling sequence <i>BCD10</i> in <i>P. putida</i> KT2440. | This study                                                               |
| pGNW2- <i>P</i> <sub>14b</sub> ( <i>BCD10</i> )→ <i>catA</i>                                  | Derivative of pGNW2 carrying homology arms (HAs) to insert the constitutive <i>P</i> <sub>14b</sub> promoter and the translational coupling sequence <i>BCD10</i> upstream of <i>catA</i> in <i>P. putida</i> KT2440.                                                                       | This study<br><i>P</i> <sub>14b</sub> : Zobel et al. <sup>14</sup>       |
| pGNW2- <i>P</i> <sub>14b</sub> ( <i>BCD10</i> )→ <i>catA-II</i>                               | Derivative of pGNW2 carrying homology arms (HAs) to insert the constitutive <i>P</i> <sub>14b</sub> promoter and the translational coupling sequence <i>BCD10</i> upstream of <i>catA-II</i> in <i>P. putida</i> KT2440.                                                                    | This study                                                               |
| pGNW2- <i>P</i> <sub>14g</sub> → <i>xylS/Pm</i> ( <i>BCD2</i> )→ <i>catA-II</i>               | Derivative of pGNW2 carrying homology arms (HAs) to insert the <i>Pm</i> promoter and the translational coupling sequence <i>BCD10</i> , as well as the                                                                                                                                     | This study                                                               |

gene sequence of *xylS* under the control of the strong, constitutive promoter  $P_{14g}$ , upstream of *catA-II* in *P. putida* KT2440.

|                                                         |                                                                                                           |                                                                    |
|---------------------------------------------------------|-----------------------------------------------------------------------------------------------------------|--------------------------------------------------------------------|
| pS628( <i>BCD1</i> )→ <i>msfGFP</i>                     | <i>oriV</i> (RK2), <i>xylS</i> , $P_m$ ( <i>BCD1</i> )→ <i>msfGFP</i> ; Gm <sup>R</sup>                   | This study<br><i>BCD1</i> : Mutalik <i>et al.</i> <sup>12</sup>    |
| pS628( <i>BCD2</i> )→ <i>msfGFP</i>                     | <i>oriV</i> (RK2), <i>xylS</i> , $P_m$ ( <i>BCD2</i> )→ <i>msfGFP</i> ; Gm <sup>R</sup>                   | This study                                                         |
| pS628( <i>BCD7</i> )→ <i>msfGFP</i>                     | <i>oriV</i> (RK2), <i>xylS</i> , $P_m$ ( <i>BCD7</i> )→ <i>msfGFP</i> ; Gm <sup>R</sup>                   | This study<br><i>BCD7</i> : Mutalik <i>et al.</i> <sup>12</sup>    |
| pS628( <i>BCD10</i> )→ <i>msfGFP</i>                    | <i>oriV</i> (RK2), <i>xylS</i> , $P_m$ ( <i>BCD10</i> )→ <i>msfGFP</i> ; Gm <sup>R</sup>                  | This study                                                         |
| pS628( <i>ML1-17</i> )( <i>BCD10</i> )→ <i>msfGFP</i>   | <i>oriV</i> (RK2), <i>xylS</i> , $P_m$ ( <i>ML1-17</i> )( <i>BCD10</i> )→ <i>msfGFP</i> ; Gm <sup>R</sup> | This study                                                         |
| pS62P <sub>lac</sub> ( <i>BCD10</i> )→ <i>msfGFP</i>    | <i>oriV</i> (RK2), P <sub>lac</sub> ( <i>BCD10</i> )→ <i>msfGFP</i> ; Gm <sup>R</sup>                     | This study                                                         |
| pS62P <sub>EM7</sub> ( <i>BCD10</i> )→ <i>msfGFP</i>    | <i>oriV</i> (RK2), P <sub>EM7</sub> ( <i>BCD10</i> )→ <i>msfGFP</i> ; Gm <sup>R</sup>                     | This study                                                         |
| pS62P <sub>14g</sub> ( <i>BCD10</i> )→ <i>msfGFP</i>    | <i>oriV</i> (RK2), P <sub>14g</sub> ( <i>BCD10</i> )→ <i>msfGFP</i> ; Gm <sup>R</sup>                     | This study<br>P <sub>14g</sub> : Zobel <i>et al.</i> <sup>14</sup> |
| pS62P <sub>14d</sub> ( <i>BCD10</i> )→ <i>msfGFP</i>    | <i>oriV</i> (RK2), P <sub>14d</sub> ( <i>BCD10</i> )→ <i>msfGFP</i> ; Gm <sup>R</sup>                     | This study<br>P <sub>14d</sub> : Zobel <i>et al.</i> <sup>14</sup> |
| pS62P <sub>J23108</sub> ( <i>BCD10</i> )→ <i>msfGFP</i> | <i>oriV</i> (RK2), P <sub>J23108</sub> ( <i>BCD10</i> )→ <i>msfGFP</i> ; Gm <sup>R</sup>                  | This study                                                         |
| pS62P <sub>J23114</sub> ( <i>BCD10</i> )→ <i>msfGFP</i> | <i>oriV</i> (RK2), P <sub>J23114</sub> ( <i>BCD10</i> )→ <i>msfGFP</i> ; Gm <sup>R</sup>                  | This study                                                         |
| pS62P <sub>J23119</sub> ( <i>BCD10</i> )→ <i>msfGFP</i> | <i>oriV</i> (RK2), P <sub>J23119</sub> ( <i>BCD10</i> )→ <i>msfGFP</i> ; Gm <sup>R</sup>                  | This study                                                         |
| pS62P <sub>cat</sub> ( <i>BCD10</i> )→ <i>msfGFP</i>    | <i>oriV</i> (RK2), <i>catR</i> , P <sub>cat</sub> ( <i>BCD10</i> )→ <i>msfGFP</i> ; Gm <sup>R</sup>       | This study                                                         |
| pS62P <sub>ben</sub> ( <i>BCD10</i> )→ <i>msfGFP</i>    | <i>oriV</i> (RK2), <i>benR</i> , P <sub>ben</sub> ( <i>BCD10</i> )→ <i>msfGFP</i> ; Gm <sup>R</sup>       | This study                                                         |
| pS634-PKB_1379                                          | <i>oriV</i> (pBBR1), <i>lacIq</i> , P <sub>trc</sub> →PKB_1379, Gm <sup>R</sup>                           | This study                                                         |
| pS634-PKB_2107                                          | <i>oriV</i> (pBBR1), <i>lacIq</i> , P <sub>trc</sub> →PKB_2107, Gm <sup>R</sup>                           | This study                                                         |
| pS634-PKB_3273                                          | <i>oriV</i> (pBBR1), <i>lacIq</i> , P <sub>trc</sub> →PKB_3273, Gm <sup>R</sup>                           | This study                                                         |

Table S5. Performance parameters for selected strains used in this study in the bioconversion of 10 mM 3-FBz.

| Strain                  | $\mu_{\max}$<br>[h <sup>-1</sup> ] | $q_s$<br>[mmol g <sub>CDW</sub> <sup>-1</sup> h <sup>-1</sup> ] | $q_p$<br>[mmol g <sub>CDW</sub> <sup>-1</sup> h <sup>-1</sup> ] |
|-------------------------|------------------------------------|-----------------------------------------------------------------|-----------------------------------------------------------------|
| <i>P. putida</i> KT2440 | 0.14 ± 0.08                        | 0.18 ± 0.02 <sup>a</sup>                                        | 0.06 ± 0.03                                                     |
| PMP1021/pSEVA228        | 0.38 ± 0.04                        | 1.02 ± 0.07                                                     | 0.47 ± 0.10 <sup>b</sup>                                        |
| PMP1021e/pSEVA228       | 0.29 ± 0.02                        | 0.57 ± 0.01                                                     | 0.32 ± 0.03 <sup>b</sup>                                        |
| PMP1021f/pSEVA228       | 0.30 ± 0.01                        | 0.84 ± 0.05                                                     | 0.41 ± 0.03 <sup>b</sup>                                        |
| PMP1021g/pSEVA228       | 0.27 ± 0.01                        | 0.74 ± 0.01                                                     | 0.36 ± 0.02 <sup>b</sup>                                        |
| PMP1030/pSEVA228        | 0.32 ± 0.03                        | 1.21 ± 0.11                                                     | 0.17 ± 0.04                                                     |
| PMP1002/pSEVA228        | 0.39 ± 0.02                        | 0.81 ± 0.01                                                     | 0.38 ± 0.02 <sup>b</sup>                                        |
| PMP1053                 | 0.45 ± 0.02                        | 1.24 ± 0.01                                                     | 0.63 ± 0.04 <sup>b</sup>                                        |
| PMP1053d                | 0.15 ± 0.01                        | 1.67 ± 0.09 <sup>a</sup>                                        | 0.53 ± 0.02                                                     |
| PMP2053                 | 0.41 ± 0.02                        | 0.26 ± 0.01 <sup>a</sup>                                        | 0.13 ± 0.05 <sup>b</sup>                                        |
| PMP1023/pSEVA228        | 0.29 ± 0.02                        | 1.10 ± 0.12                                                     | 0.43 ± 0.03 <sup>b</sup>                                        |
| PMP1023/pSEVA228.2      | 0.25 ± 0.02                        | 0.84 ± 0.01                                                     | 0.36 ± 0.01 <sup>b</sup>                                        |
| PMP1024                 | 0.30 ± 0.01                        | 0.95 ± 0.11                                                     | 0.48 ± 0.02 <sup>b</sup>                                        |

To determine the biomass-specific 3-FBz uptake rates ( $q_s$ ) and 2-FMA formation rates ( $q_p$ ), the strains were cultured in Erlenmeyer flasks filled with 10% (v/v) DBM medium supplemented with 30 mM glucose and 10 mM 3-FBz. Maximum specific growth rates ( $\mu_{\max}$ ) were determined in microtiter plate experiments in the same medium. <sup>a</sup> incomplete consumption of 3-FBz; <sup>b</sup> no detectable fluorocatechol at the end of the fermentation.

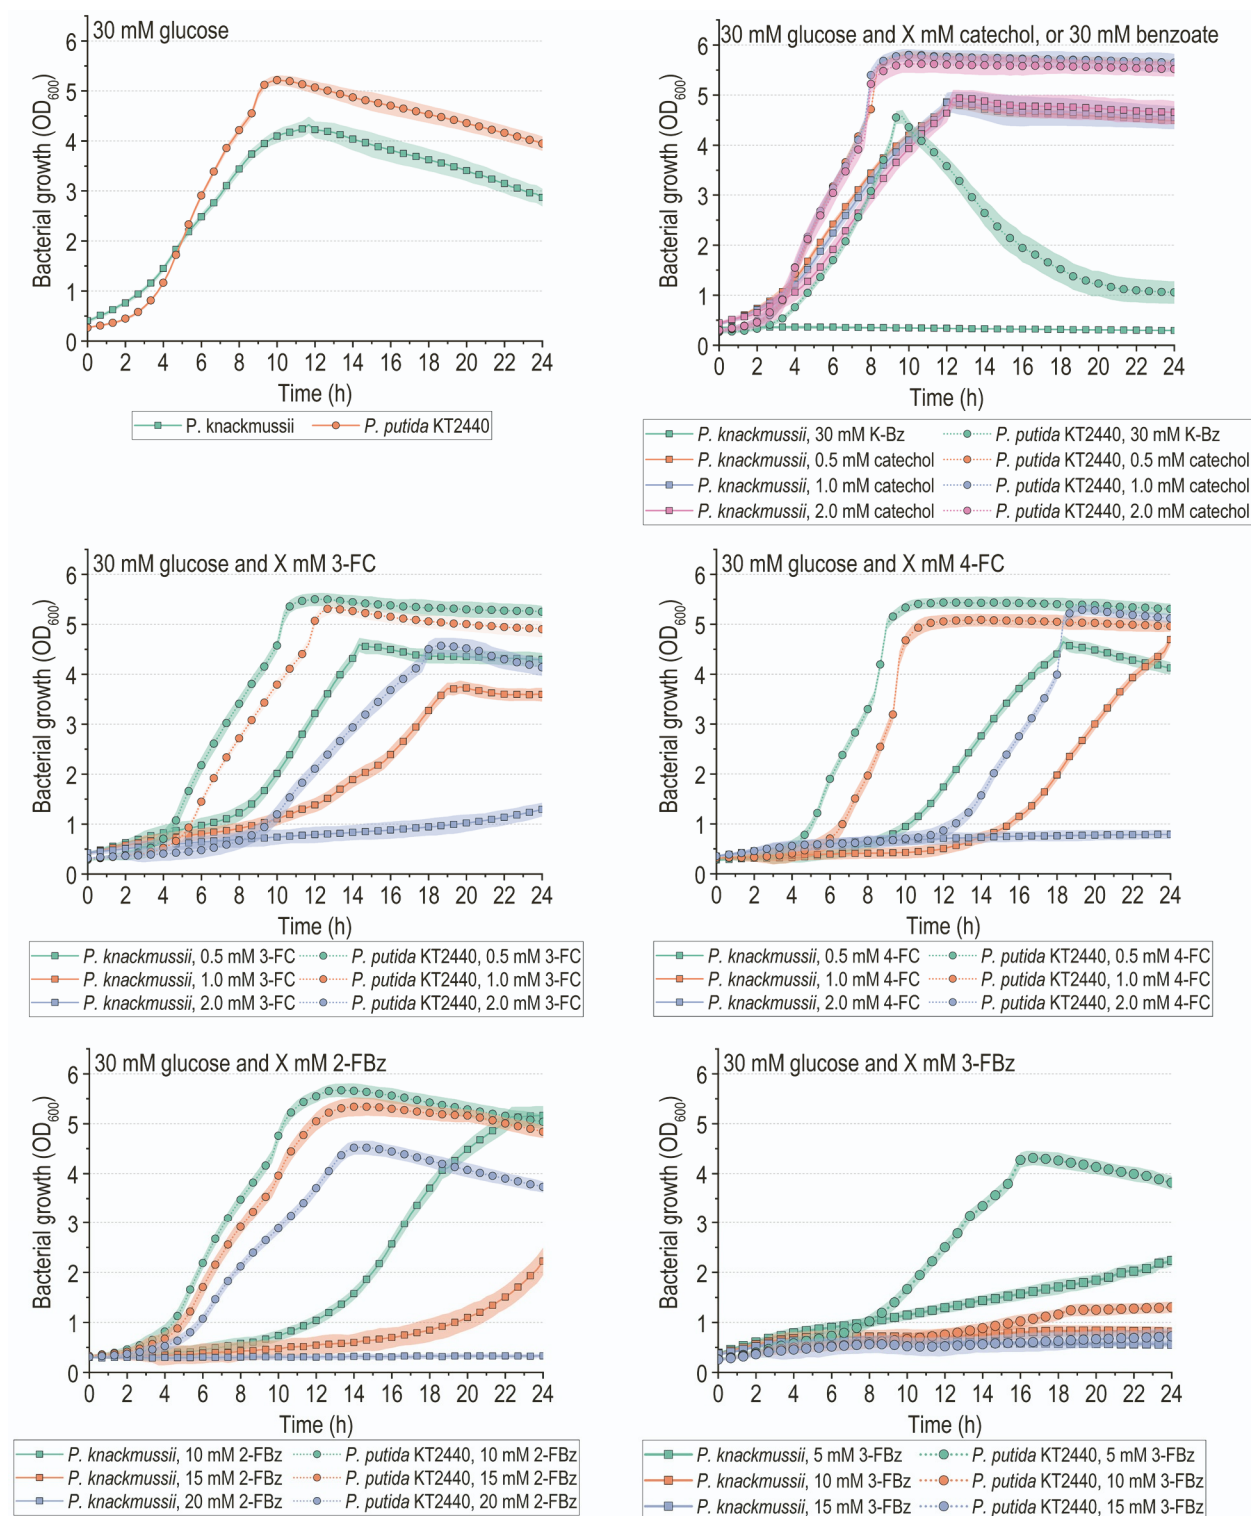

Figure S1. Physiological response to fluorinated and nonfluorinated *ortho*-cleavage metabolites. *P. knackmussii* and *P. putida* KT2440 were cultured in microtiter plates with 200  $\mu$ L of DBM medium supplemented with 30 mM glucose or potassium benzoate (K-Bz) as the source of carbon and energy, as well as varying concentrations of metabolites involved in the bioconversion process. Error bars represent the standard deviations from three biological replicates.

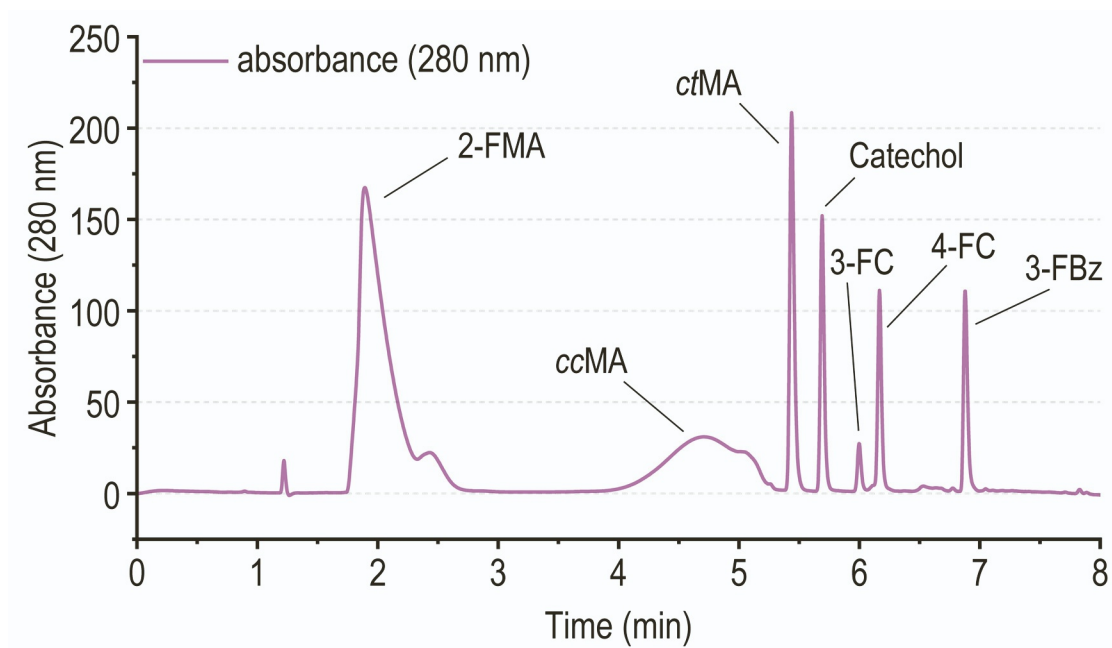

Figure S2. Quantification of (fluoro)metabolites *via* HPLC. The displayed chromatogram represents a calibration standard containing 1 mM of each compound with UV absorption measured at 280 nm. 2-FBz eluted at a retention time of 6.4 min (not shown).

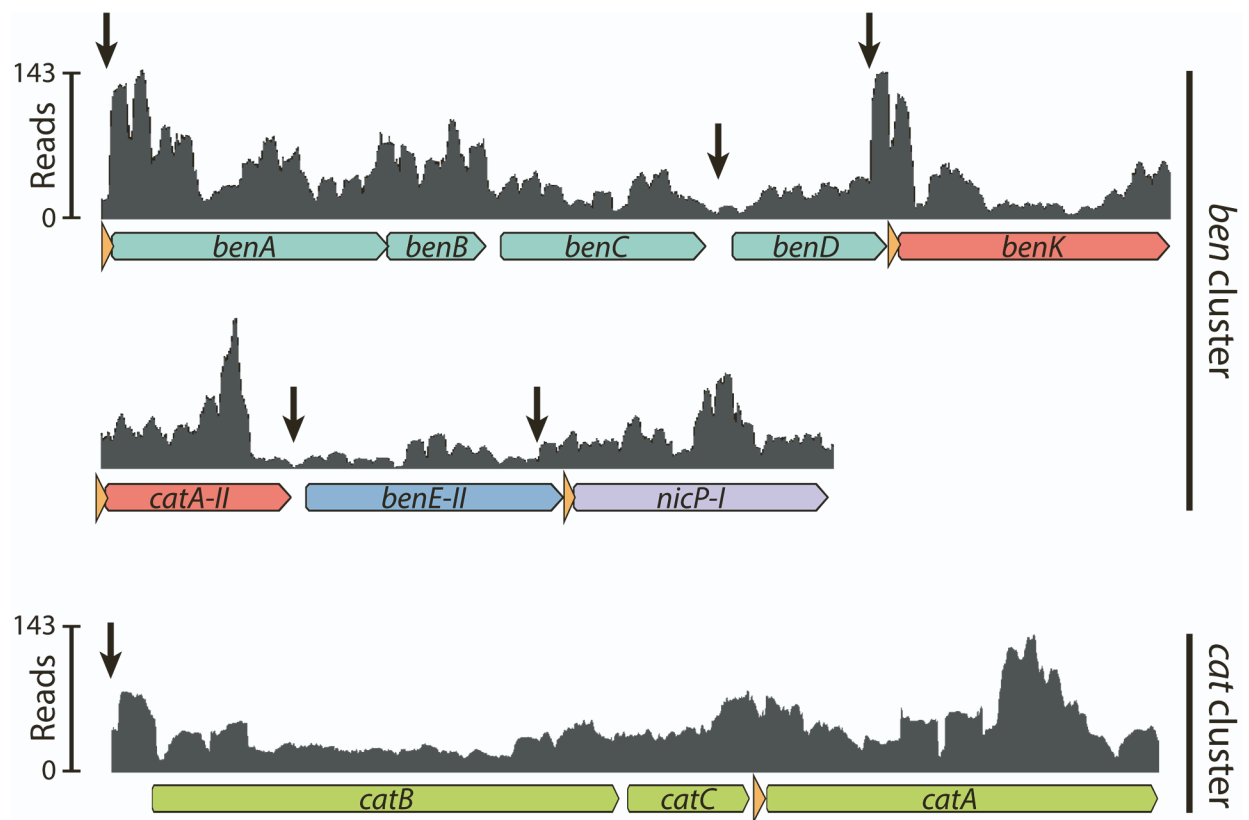

Figure S3. Transcriptome analysis of genes within the *ben* and *cat* clusters. Transcriptomic data published under various experimental conditions was pooled and mapped to the chromosome sequence of *P. putida* KT2440 (NCBI RefSeq NC\_002947). Grey columns represent the read coverage for every nucleotide position. Orange triangles indicate identified Hfq recognition sequences. Black arrows highlight potential transcription start positions inferred from the course of coverage. The genes are drawn with colors indicating concerted expression as a transcription unit based on computational predictions on BioCyc.org.<sup>15</sup>

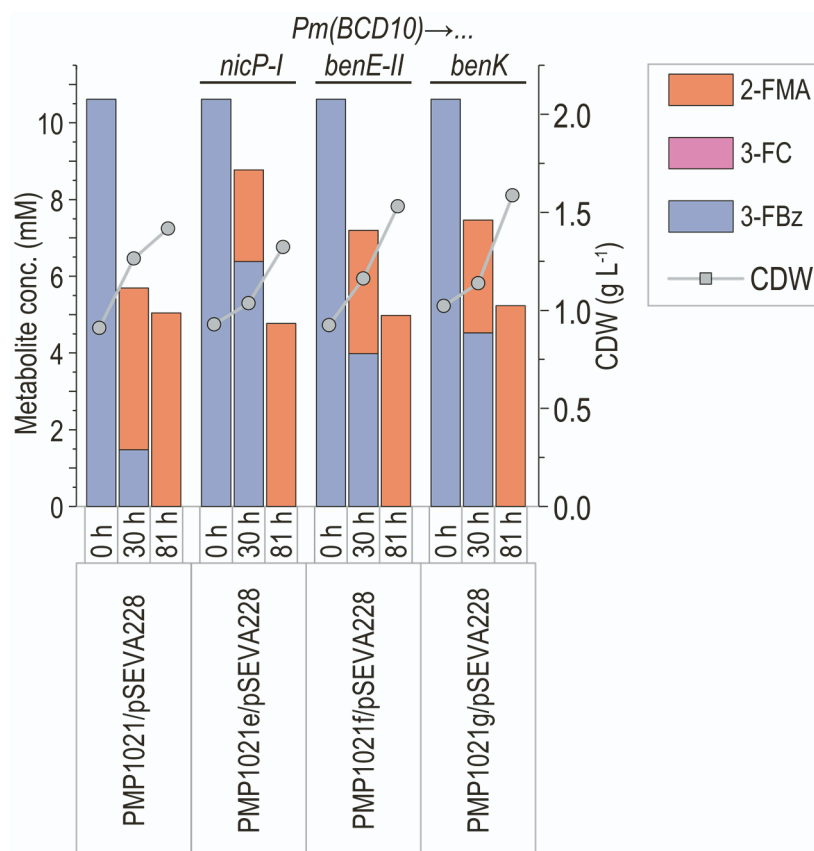

Figure S4. Bioconversion performance of *second-generation* strains with altered transporter expression. Strains were cultured in Erlenmeyer flasks filled with 10% (v/v) DBM medium supplemented with 30 mM glucose, 5 g L<sup>-1</sup> MOPS, and 10 mM 3-FBz.

## REFERENCES

1. Platt, R., Drescher, C., Park, S.K., and Phillips, G.J. (2000). Genetic system for reversible integration of DNA constructs and *lacZ* gene fusions into the *Escherichia coli* chromosome. *Plasmid* 43, 12-23. 10.1006/plas.1999.1433.
2. Worsey, M.J., and Williams, P.A. (1975). Metabolism of toluene and xylenes by *Pseudomonas putida* (arvilla) mt-2: evidence for a new function of the TOL plasmid. *J. Bacteriol.* 124, 7-13.
3. Bagdasarian, M., Lurz, R., Rückert, B., Franklin, F.C.H., Bagdasarian, M.M., Frey, J., and Timmis, K.N. (1981). Specific purpose plasmid cloning vectors. II. Broad host range, high copy number, RSF1010-derived vectors, and a host-vector system for gene cloning in *Pseudomonas*. *Gene* 16, 237-247. 10.1016/0378-1119(81)90080-9.
4. Stolz, A., Busse, H.-J., and Kämpfer, P. (2007). *Pseudomonas knackmussii* sp. nov. *Internat. J. Syst. Evol. Microbiol.* 57, 572-576. 10.1099/ijs.0.64761-0.
5. Wirth, N.T., Kozaeva, E., and Nikel, P.I. (2020). Accelerated genome engineering of *Pseudomonas putida* by I-SceI—mediated recombination and CRISPR-Cas9 counterselection. *Microb. Biotechnol.* 13, 233-249. 10.1111/1751-7915.13396.
6. Volke, D.C., Friis, L., Wirth, N.T., Turlin, J., and Nikel, P.I. (2020). Synthetic control of plasmid replication enables target- and self-curing of vectors and expedites genome engineering of *Pseudomonas putida*. *Metab. Eng. Commun.* 10, e00126. 10.1016/j.mec.2020.e00126.
7. Silva-Rocha, R., Martínez-García, E., Calles, B., Chavarria, M., Arce-Rodríguez, A., de las Heras, A., Páez-Espino, A.D., Durante-Rodríguez, G., Kim, J., Nikel, P.I., et al. (2013). The Standard European Vector Architecture (SEVA): a coherent platform for the analysis and deployment of complex prokaryotic phenotypes. *Nucleic Acids Res.* 41, D666-D675. 10.1093/nar/gks1119.
8. Martínez-García, E., Aparicio, T., Goñi-Moreno, A., Fraile, S., and de Lorenzo, V. (2015). SEVA 2.0: an update of the Standard European Vector Architecture for de-/re-construction of bacterial functionalities. *Nucleic Acids Res.* 43, D1183-D1189. 10.1093/nar/gku1114.
9. Ramos, J.L., Michan, C., Rojo, F., Dwyer, D., and Timmis, K. (1990). Signal-regulator interactions, genetic analysis of the effector binding site of *xylS*, the benzoate-activated positive regulator of *Pseudomonas* TOL plasmid *meta*-cleavage pathway operon. *J. Mol. Biol.* 211, 373-382. 10.1016/0022-2836(90)90358-S.
10. Volke, D.C., Turlin, J., Mol, V., and Nikel, P.I. (2020). Physical decoupling of *XylS/Pm* regulatory elements and conditional proteolysis enable precise control of gene expression in *Pseudomonas putida*. *Microb. Biotechnol.* 13, 222-232. 10.1111/1751-7915.13383.
11. de Boer, H.A., Comstock, L.J., and Vasser, M. (1983). The *tac* promoter: a functional hybrid derived from the *trp* and *lac* promoters. *Proc. Natl. Acad. Sci. USA* 80, 21-25. 10.1073/pnas.80.1.21.
12. Mutalik, V.K., Guimaraes, J.C., Cambray, G., Lam, C., Christoffersen, M.J., Mai, Q.A., Tran, A.B., Paull, M., Keasling, J.D., Arkin, A.P., and Endy, D. (2013). Precise and reliable gene expression via standard transcription and translation initiation elements. *Nat. Methods* 10, 354-360. 10.1038/nmeth.2404.
13. Bakke, I., Berg, L., Aune, T.E., Brautaset, T., Sletta, H., Tondervik, A., and Valla, S. (2009). Random mutagenesis of the *Pm* promoter as a powerful strategy for improvement of recombinant-gene expression. *Appl. Environ. Microbiol.* 75, 2002-2011. 10.1128/AEM.02315-08.
14. Zobel, S., Benedetti, I., Eisenbach, L., de Lorenzo, V., Wierckx, N.J.P., and Blank, L.M. (2015). Tn7-Based device for calibrated heterologous gene expression in *Pseudomonas putida*. *ACS Synth. Biol.* 4, 1341-1351. 10.1021/acssynbio.5b00058.
15. Caspi, R., Billington, R., Fulcher, C.A., Keseler, I.M., Kothari, A., Krummenacker, M., Latendresse, M., Midford, P.E., Ong, Q., Ong, W.K., et al. (2018). The MetaCyc database of metabolic pathways and enzymes. *Nucleic Acids Res.* 46, D633-D639. 10.1093/nar/gkx935.
